# Supplementary material
Source: PubMed Central journal article supplement (PMC4801230)
Supplement: NIHMS765467-supplement-2.pdf [file NIHMS765467-supplement-2.pdf]

**Table S1.** Description of sugarcane job categories and likelihood of exposure to putative causal agents

| Job Category             | Description                                                                    | Likelihood of Exposure |               |               |               |
|--------------------------|--------------------------------------------------------------------------------|------------------------|---------------|---------------|---------------|
|                          |                                                                                | Heat stress            | Agrichemicals | Metals (dust) | Leptospirosis |
| <b>Field workers</b>     |                                                                                |                        |               |               |               |
| Cane cutter              | Manually harvests the cane using machetes                                      | High                   | Medium        | High          | High          |
| Seeder                   | Transports seed billets and plants seeds                                       | High                   | Low           | High          | High          |
| Seed cutter              | Cuts sugarcane stalks to make seed billets                                     | Medium                 | Low           | Medium        | Medium        |
| Agrichemical applicator  | Mixes and applies agrichemicals (primarily herbicides) using backpack sprayers | High                   | High          | Medium        | Medium        |
| Irrigator                | Diverts water using a gravity-fed approach to irrigate cane fields             | Medium                 | Medium        | Medium        | High          |
| <b>Non-field workers</b> |                                                                                |                        |               |               |               |
| Driver                   | Operates vehicles during all steps of the sugarcane process                    | Low                    | Low           | Low           | Low           |
| Factory worker           | Processes the cane to create sugar, ethanol, and biofuels                      | Low                    | Low           | Low           | Low           |

*Note:* Likelihood of exposure to putative causal agents was determined relative to the other jobs.
