# Supplementary material
Source: PubMed Central journal article supplement (PMC4801230)
Supplement: NIHMS765467-supplement-3.pdf [file NIHMS765467-supplement-3.pdf]

**Table S2.** Non-normalized urinary biomarkers of kidney injury [geometric mean] among sugarcane workers at pre- and late-harvest, stratified by sex

|                   | n   | NGAL (ng/mL) |      |        | IL-18 (pg/mL) |      |     | NAG (mU/mL) |      |        | Urine creatinine (mg/mL) |      |       |
|-------------------|-----|--------------|------|--------|---------------|------|-----|-------------|------|--------|--------------------------|------|-------|
|                   |     | Pre          | Late | P      | Pre           | Late | P   | Pre         | Late | P      | Pre                      | Late | P     |
| <b>Male</b>       |     |              |      |        |               |      |     |             |      |        |                          |      |       |
| Overall           | 251 | 6.4          | 9.9  | <0.001 | 7.7           | 8.3  | 0.4 | 1.08        | 0.85 | 0.02   | 0.86                     | 0.95 | 0.09  |
| Job               |     |              |      |        |               |      |     |             |      |        |                          |      |       |
| Cane cutter       | 51  | 7.9          | 16.7 | <0.001 | 9.4           | 10.9 | 0.5 | 1.21        | 1.33 | 0.6    | 1.04                     | 0.86 | 0.1   |
| Seeder            | 15  | 12.0         | 11.1 | 0.7    | 6.4           | 10.7 | 0.2 | 0.91        | 1.17 | 0.6    | 1.15                     | 0.73 | 0.1   |
| Seed cutter       | 9   | 9.2          | 7.3  | 0.5    | 8.4           | 6.4  | 0.6 | 1.40        | 0.75 | 0.2    | 0.91                     | 1.18 | 0.4   |
| Agrichemical app. | 29  | 6.9          | 8.2  | 0.5    | 9.4           | 10.1 | 0.7 | 1.06        | 1.11 | 0.9    | 0.97                     | 1.19 | 0.2   |
| Irrigator         | 49  | 5.0          | 10.3 | <0.001 | 4.7           | 5.2  | 0.5 | 0.64        | 0.63 | 0.9    | 0.70                     | 0.70 | 0.9   |
| Driver            | 41  | 5.1          | 8.1  | 0.02   | 10.0          | 10.7 | 0.8 | 0.81        | 0.74 | 0.8    | 0.74                     | 1.08 | 0.002 |
| Factory worker    | 57  | 6.2          | 7.6  | 0.4    | 7.6           | 7.0  | 0.7 | 1.91        | 0.66 | <0.001 | 0.86                     | 1.11 | 0.06  |
| <b>Female</b>     |     |              |      |        |               |      |     |             |      |        |                          |      |       |
| Overall           | 33  | 22.8         | 14.6 | 0.1    | 18.6          | 14.6 | 0.4 | 1.04        | 0.73 | 0.1    | 0.81                     | 0.58 | 0.01  |
| Job               |     |              |      |        |               |      |     |             |      |        |                          |      |       |
| Cane cutter       | -   | -            | -    | -      | -             | -    | -   | -           | -    | -      | -                        | -    | -     |
| Seeder            | 21  | 24.9         | 14.1 | 0.1    | 20.4          | 17.0 | 0.6 | 0.92        | 0.72 | 0.2    | 0.77                     | 0.57 | 0.05  |
| Seed cutter       | 10  | 21.9         | 15.0 | 0.5    | 12.8          | 9.0  | 0.6 | 1.05        | 0.82 | 0.6    | 0.84                     | 0.60 | 0.3   |
| Agrichemical app. | -   | -            | -    | -      | -             | -    | -   | -           | -    | -      | -                        | -    | -     |
| Irrigator         | -   | -            | -    | -      | -             | -    | -   | -           | -    | -      | -                        | -    | -     |
| Driver            | -   | -            | -    | -      | -             | -    | -   | -           | -    | -      | -                        | -    | -     |
| Factory worker    | 2   | 10.6         | 18.2 | 0.8    | 43.5          | 32.9 | 0.6 | 3.79        | 0.51 | 0.05   | 1.14                     | 0.64 | 0.07  |

Note: P is for comparison of pre- to late-harvest levels of each biomarker, using paired t-tests.

Abbreviations: NGAL, neutrophil gelatinase-associated lipocalin; IL-18, interleukin-18; NAG, N-acetyl-D-glucosaminidase.
