# Supplementary material
Source: PubMed Central journal article supplement (PMC4801230)
Supplement: NIHMS765467-supplement-4.pdf [file NIHMS765467-supplement-4.pdf]

**Table S3.** Model output for linear mixed effects models evaluating change in biomarkers of kidney injury by fieldworker status

| Variable                      | All Workers (n=284) |        |                  |        |               |        | Restricted to Men (n=251) |        |                  |        |               |        |
|-------------------------------|---------------------|--------|------------------|--------|---------------|--------|---------------------------|--------|------------------|--------|---------------|--------|
|                               | NGAL [ln(µg/g)]     |        | IL-18 [ln(ng/g)] |        | NAG [ln(U/g)] |        | NGAL [ln(µg/g)]           |        | IL-18 [ln(ng/g)] |        | NAG [ln(U/g)] |        |
|                               | β                   | P      | β                | P      | β             | P      | β                         | P      | β                | P      | β             | P      |
| <b>Intercept</b>              | 2.56                | <0.001 | 3.55             | <0.001 | 0.42          | 0.2    | 1.59                      | <0.001 | 2.51             | <0.001 | 0.26          | 0.3    |
| <b>Time</b>                   |                     |        |                  |        |               |        |                           |        |                  |        |               |        |
| Late-harvest                  | 0.02                | 0.9    | -0.32            | 0.03   | -1.03         | <0.001 | 0.001                     | 0.9    | -0.33            | 0.03   | -1.02         | <0.001 |
| Pre-harvest                   | ref                 |        | ref              |        | ref           |        | ref                       |        | ref              |        | ref           |        |
| <b>Job</b>                    |                     |        |                  |        |               |        |                           |        |                  |        |               |        |
| Field worker                  | 0.22                | 0.2    | -0.36            | 0.01   | -0.42         | 0.008  | 0.15                      | 0.3    | -0.35            | 0.02   | -0.40         | 0.01   |
| Non-field worker              | ref                 |        | ref              |        | ref           |        | ref                       |        | ref              |        | ref           |        |
| <b>Job*Time</b>               |                     |        |                  |        |               |        |                           |        |                  |        |               |        |
| Field worker*Late-harvest     | 0.40                | 0.02   | 0.48             | 0.01   | 1.07          | <0.001 | 0.55                      | 0.002  | 0.51             | 0.009  | 1.06          | <0.001 |
| Non-field worker*Late-harvest | ref                 |        | ref              |        | ref           |        | ref                       |        | ref              |        | ref           |        |
| <b>Sex</b>                    |                     |        |                  |        |               |        |                           |        |                  |        |               |        |
| Male                          | -0.98               | <0.001 | -0.98            | <0.001 | -0.17         | 0.4    | -                         |        | -                |        | -             |        |
| Female                        | ref                 |        | ref              |        | ref           |        | -                         |        | -                |        | -             |        |
| <b>Age</b>                    |                     |        |                  |        |               |        |                           |        |                  |        |               |        |
| (Continuous, per 5 y)         | 0.01                | 0.1    | -0.002           | 0.8    | 0.01          | 0.4    | 0.01                      | 0.2    | 0.00             | 0.9    | 0.01          | 0.5    |
| <b>Years worked</b>           |                     |        |                  |        |               |        |                           |        |                  |        |               |        |
| (Continuous, per 5 y)         | -0.002              | 0.8    | -0.01            | 0.2    | 0.005         | 0.6    | -0.001                    | 0.9    | -0.01            | 0.2    | 0.01          | 0.5    |

Note: individual job categories were grouped into field workers (cane cutters, seeders, seed cutters, agrichemical applicators, and irrigators), and non-field workers (drivers and factory workers).

Abbreviations: NGAL, neutrophil gelatinase-associated lipocalin; IL-18, interleukin-18; NAG, N-acetyl-D-glucosaminidase.
