# Supplementary material
Source: PubMed Central journal article supplement (PMC4801230)
Supplement: NIHMS765467-supplement-5.pdf [file NIHMS765467-supplement-5.pdf]

**Table S4.** Model output for linear mixed effects models evaluating change in biomarkers of kidney injury by job

| Variable                       | All Workers (n=284) |        |                  |        |               |        | Restricted to Men (n=251) |        |                  |        |               |        |
|--------------------------------|---------------------|--------|------------------|--------|---------------|--------|---------------------------|--------|------------------|--------|---------------|--------|
|                                | NGAL [ln(µg/g)]     |        | IL-18 [ln(ng/g)] |        | NAG [ln(U/g)] |        | NGAL [ln(µg/g)]           |        | IL-18 [ln(ng/g)] |        | NAG [ln(U/g)] |        |
|                                | β                   | P      | β                | P      | β             | P      | β                         | P      | β                | P      | β             | P      |
| <b>Intercept</b>               | 1.56                | <0.001 | 2.49             | <0.001 | 0.47          | 0.08   | 1.59                      | <0.001 | 2.47             | <0.001 | 0.49          | 0.07   |
| <b>Time</b>                    |                     |        |                  |        |               |        |                           |        |                  |        |               |        |
| Late-harvest                   | -0.01               | 0.9    | -0.31            | 0.1    | -1.32         | <0.001 | -0.05                     | 0.8    | -0.33            | 0.09   | -1.31         | <0.001 |
| Pre-harvest                    | ref                 |        | ref              |        | ref           |        | ref                       |        | ref              |        | ref           |        |
| <b>Job</b>                     |                     |        |                  |        |               |        |                           |        |                  |        |               |        |
| Cane cutter                    | 0.17                | 0.5    | -0.06            | 0.8    | -0.50         | 0.03   | 0.16                      | 0.5    | -0.04            | 0.8    | -0.48         | 0.04   |
| Seeder                         | 0.63                | 0.02   | -0.23            | 0.4    | -0.54         | 0.07   | 0.48                      | 0.1    | -0.44            | 0.2    | -0.51         | 0.1    |
| Seed cutter                    | 0.48                | 0.1    | -0.35            | 0.3    | -0.37         | 0.3    | 0.48                      | 0.2    | -0.06            | 0.9    | -0.18         | 0.7    |
| Agrichemical applicator        | 0.01                | 0.9    | 0.06             | 0.8    | -0.70         | 0.009  | -0.02                     | 0.9    | 0.08             | 0.8    | -0.69         | 0.01   |
| Irrigator                      | 0.09                | 0.7    | -0.34            | 0.1    | -0.82         | <0.001 | 0.07                      | 0.7    | -0.32            | 0.1    | -0.81         | <0.001 |
| Driver                         | -0.05               | 0.8    | 0.48             | 0.04   | -0.60         | 0.01   | -0.07                     | 0.8    | 0.49             | 0.03   | -0.58         | 0.02   |
| Factory worker                 | ref                 |        | ref              |        | ref           |        | ref                       |        | ref              |        | ref           |        |
| <b>Job*Time</b>                |                     |        |                  |        |               |        |                           |        |                  |        |               |        |
| Cane cutter*Late-harvest       | 0.94                | <0.001 | 0.64             | 0.03   | 1.59          | <0.001 | 0.98                      | <0.001 | 0.66             | 0.02   | 1.59          | <0.001 |
| Seeder*Late-harvest            | 0.00                | 0.9    | 0.75             | 0.02   | 1.48          | <0.001 | 0.40                      | 0.3    | 1.23             | 0.005  | 1.61          | <0.001 |
| Seed cutter*Late-harvest       | -0.24               | 0.5    | 0.05             | 0.9    | 0.94          | 0.01   | -0.44                     | 0.4    | -0.20            | 0.7    | 0.43          | 0.4    |
| Agrichemical app.*Late-harvest | 0.00                | 0.9    | 0.18             | 0.6    | 1.17          | <0.001 | 0.04                      | 0.9    | 0.20             | 0.6    | 1.17          | <0.001 |
| Irrigator*Late-harvest         | 0.73                | 0.006  | 0.41             | 0.2    | 1.30          | <0.001 | 0.77                      | 0.003  | 0.43             | 0.1    | 1.29          | <0.001 |
| Driver*Late-harvest            | 0.09                | 0.8    | -0.04            | 0.9    | 0.71          | 0.01   | 0.12                      | 0.6    | -0.02            | 0.9    | 0.70          | 0.02   |
| Factory worker*Late-harvest    | ref                 |        | ref              |        | ref           |        | ref                       |        | ref              |        | ref           |        |
| <b>Sex</b>                     |                     |        |                  |        |               |        |                           |        |                  |        |               |        |
| Male                           | -0.90               | <0.001 | -1.08            | <0.001 | -0.07         | 0.8    | -                         |        | -                |        | -             |        |
| Female                         | ref                 |        | ref              |        | ref           |        | -                         |        | -                |        | -             |        |
| <b>Age</b>                     |                     |        |                  |        |               |        |                           |        |                  |        |               |        |
| (Continuous, per 5 y)          | 0.05                | 0.2    | -0.03            | 0.3    | 0.03          | 0.5    | 0.04                      | 0.2    | -0.03            | 0.3    | 0.02          | 0.7    |
| <b>Years worked</b>            |                     |        |                  |        |               |        |                           |        |                  |        |               |        |
| (Continuous, per 5 y)          | 0.02                | 0.7    | -0.02            | 0.7    | 0.06          | 0.2    | 0.02                      | 0.6    | -0.02            | 0.7    | 0.07          | 0.2    |

Abbreviations: NGAL, neutrophil gelatinase-associated lipocalin; IL-18, interleukin-18; NAG, N-acetyl-D-glucosaminidase.
