# Supplementary material
Source: PubMed Central journal article supplement (PMC4801230)
Supplement: NIHMS765467-supplement-6.pdf [file NIHMS765467-supplement-6.pdf]

**Table S5.** Multivariable analysis of late-harvest biomarkers of kidney injury by hydration among sugarcane workers, stratified by job

| Variable                                          | NGAL [ln( $\mu$ g/g)] |              | IL-18 [ln(ng/g)] |              | NAG [ln(U/g)] |              |
|---------------------------------------------------|-----------------------|--------------|------------------|--------------|---------------|--------------|
|                                                   | Relative Mean         | (95% CI)     | Relative Mean    | (95% CI)     | Relative Mean | (95% CI)     |
| <b>Cane cutter</b>                                |                       |              |                  |              |               |              |
| Water consumption (L)                             | 0.99                  | (0.88, 1.11) | 1.01             | (0.87, 1.18) | 1.01          | (0.92, 1.10) |
| Electrolyte solution consumption (n) <sup>a</sup> | 0.77                  | (0.61, 0.98) | 1.09             | (0.80, 1.47) | 0.84          | (0.70, 1.01) |
| <b>Seeder</b>                                     |                       |              |                  |              |               |              |
| Water consumption (L)                             | 0.92                  | (0.73, 1.15) | 0.98             | (0.83, 1.17) | 1.00          | (0.79, 1.26) |
| Electrolyte solution consumption (n)              | 1.10                  | (0.82, 1.49) | 0.94             | (0.75, 1.17) | 0.94          | (0.69, 1.28) |
| <b>Seed cutter</b>                                |                       |              |                  |              |               |              |
| Water consumption (L)                             | 1.02                  | (0.77, 1.36) | 1.07             | (0.76, 1.51) | 1.25          | (0.91, 1.72) |
| Electrolyte solution consumption (n)              | 0.92                  | (0.67, 1.29) | 0.69             | (0.46, 1.04) | 0.67          | (0.44, 1.02) |
| <b>Agrichemical applicator</b>                    |                       |              |                  |              |               |              |
| Water consumption (L)                             | 1.19                  | (0.89, 1.59) | 0.93             | (0.72, 1.21) | 0.89          | (0.75, 1.05) |
| Electrolyte solution consumption (n)              | 0.93                  | (0.70, 1.22) | 1.24             | (0.96, 1.60) | 0.98          | (0.85, 1.14) |
| <b>Irrigator</b>                                  |                       |              |                  |              |               |              |
| Water consumption (L)                             | 0.97                  | (0.81, 1.15) | 1.03             | (0.87, 1.23) | 1.02          | (0.84, 1.23) |
| Electrolyte solution consumption (n)              | 1.05                  | (0.85, 1.28) | 1.00             | (0.81, 1.23) | 1.14          | (0.92, 1.42) |
| <b>Driver</b>                                     |                       |              |                  |              |               |              |
| Water consumption (L)                             | 0.97                  | (0.82, 1.14) | 1.16             | (0.93, 1.44) | 1.08          | (0.92, 1.28) |
| Electrolyte solution consumption (n)              | 1.06                  | (0.84, 1.34) | 1.00             | (0.74, 1.35) | 1.09          | (0.86, 1.38) |
| <b>Factory worker</b>                             |                       |              |                  |              |               |              |
| Water consumption (L)                             | 1.13                  | (0.91, 1.41) | 1.03             | (0.85, 1.24) | 1.02          | (0.87, 1.20) |
| Electrolyte solution consumption (n)              | 1.12                  | (0.93, 1.35) | 1.09             | (0.93, 1.27) | 1.05          | (0.91, 1.21) |

Note: Relative mean ( $e^{\beta}$ ) represents the fold-change in biomarker per unit increase of consumption. Model parameters include water, electrolyte solution, sex, age, years worked, and pre-harvest biomarker value.

Abbreviations: NGAL, neutrophil gelatinase-associated lipocalin; IL-18, interleukin-18; NAG, N-acetyl-D-glucosaminidase.

<sup>a</sup> Each packet (n) is 100mL.
