# Supplementary material
Source: PubMed Central journal article supplement (PMC4801230)

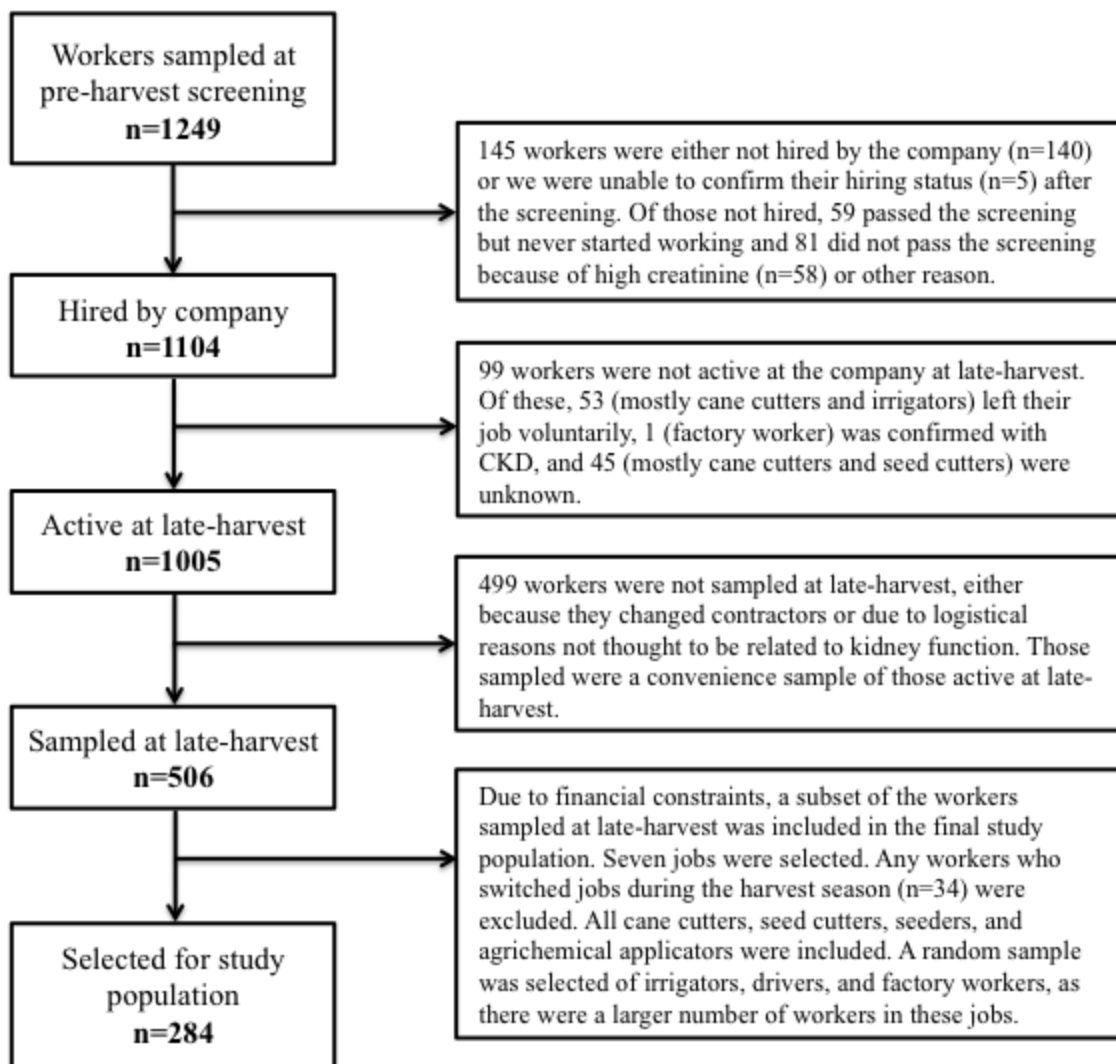

**Figure S1.** Derivation of study population (n=284)

Supplement: NIHMS765467-supplement-1.pdf [file NIHMS765467-supplement-1.pdf]
